# Supplementary material
Source: publisher figshare collection journal article supplement (https://tandf.figshare.com/articles/dataset/_/11907225)

Appendix 6. Number of zooids in the overwintered and young colonies of *Callopora craticula* sampled in 2012-2015. Alternating months are shaded in grey. Thin horizontal line is positioned at 25 zooids.

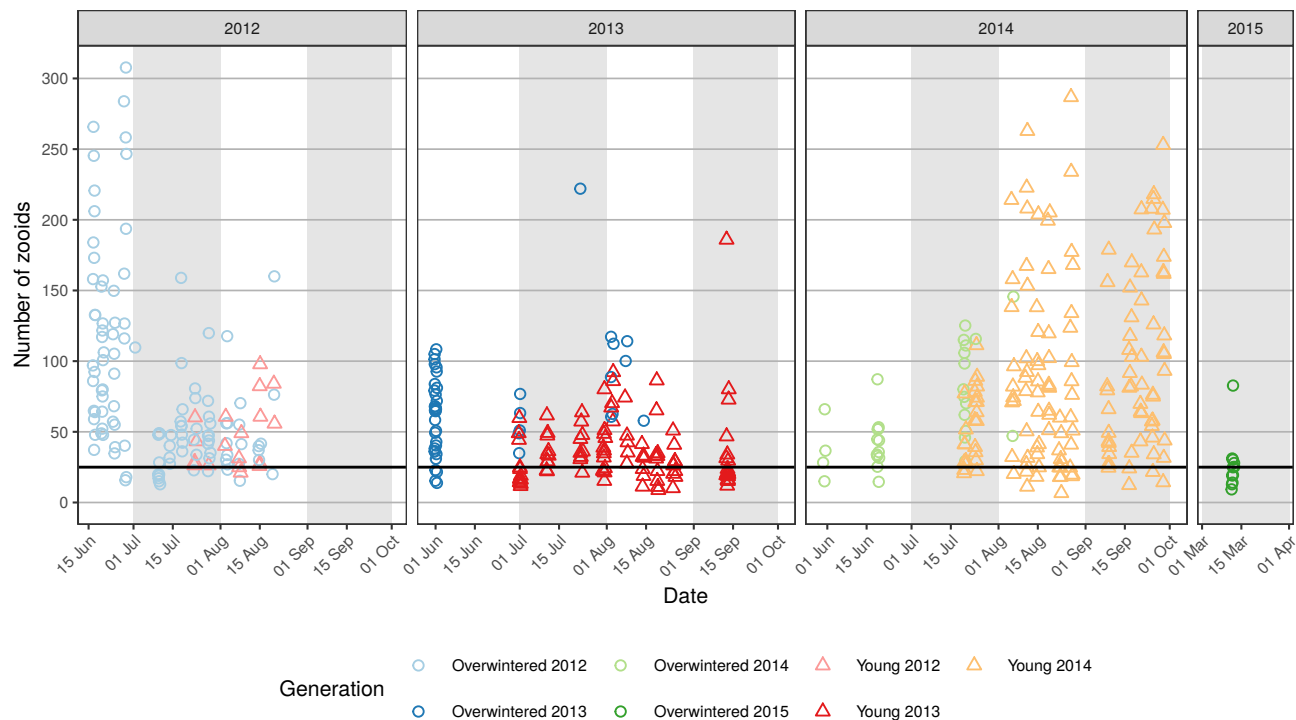

Supplement: Supplementary file 1 [file 1]
