# Supplementary material
Source: publisher figshare collection journal article supplement (https://tandf.figshare.com/articles/dataset/_/11907225)

Appendix 4. Number of zooids in the overwintered and young colonies of *Electra pilosa* in 2013-2014. Alternating months are shaded in grey. Thin horizontal line is positioned at 25 zooids.

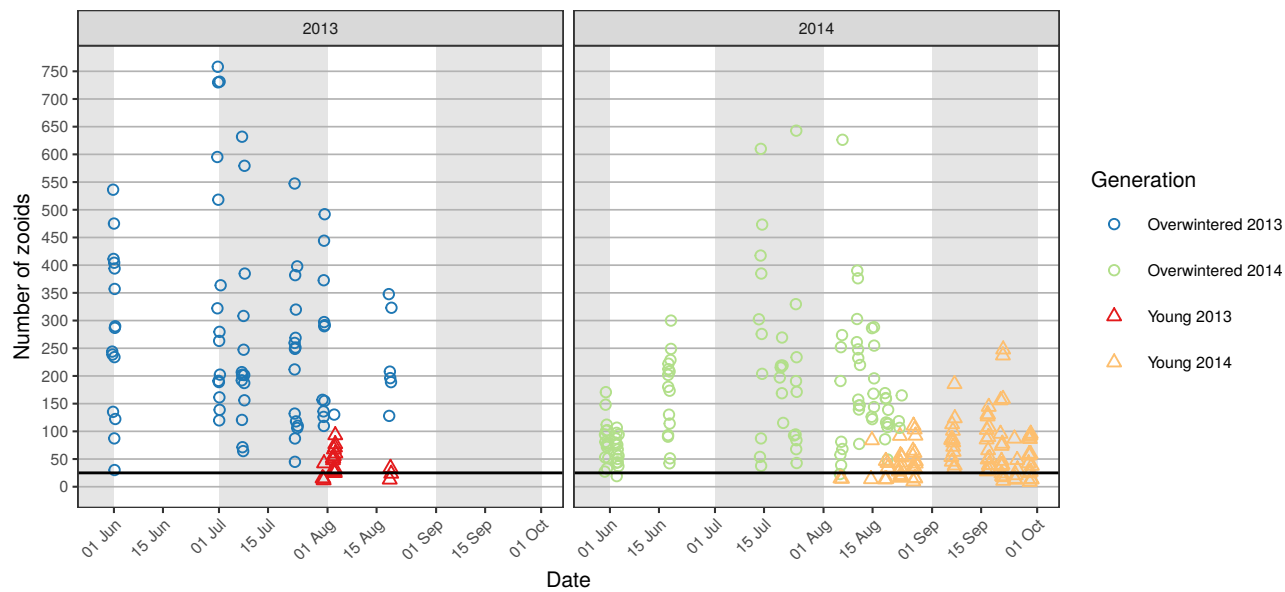

Supplement: Supplementary file 2 [file 1]
